# Supplementary material for: Determinants Associated With the Risk of Emergency Department Visits Among Patients Receiving Integrated Home Care Services: A 6-Year Retrospective Observational Study in a Large Italian Region
Source: PubMed Central journal article supplement (PMC9278539; doi:10.34172/ijhpm.2020.79), 2020-06-07

## Supplementary file 1. Risk Analysis POP.1

### Risk Analysis

EDxIHC vs. SEX

Confusion Matrix Computed

Confusion Matrix (Fisher's Exact Test for Count Data) - **p-value = 6.55e-84**

|              | <b>EDxIHC +</b> | <b>EDxIHC -</b> | <b>Total</b> | <b>Inc risk *</b> | <b>Odds</b> |
|--------------|-----------------|-----------------|--------------|-------------------|-------------|
| <b>SEX+</b>  | 16355           | 15046           | 31401        | 52.1              | 1.09        |
| <b>SEX-</b>  | 20869           | 14163           | 35032        | 59.6              | 1.47        |
| <b>Total</b> | 37224           | 29209           | 66433        | 56.0              | 1.27        |

### Risk-Analysis Results

X2 test statistic - **p-value: 0**

| <b>dati</b>                | <b>Estimate</b> | <b>95%CI +</b> | <b>95%CI -</b> |
|----------------------------|-----------------|----------------|----------------|
| <b>Risk Ratio</b>          | 0.874           | 0.862          | 0.886          |
| <b>Odds Ratio</b>          | 0.738           | 0.715          | 0.761          |
| <b>Attr.Risk</b>           | -7.49           | -8.24          | -6.73          |
| <b>Pop.Attr.Risk</b>       | -3.54           | -4.18          | -2.9           |
| <b>Attr.Fract.Risk</b>     | -0.144          | -0.159         | -0.128         |
| <b>Pop.Attr.Fract.Risk</b> | -0.063          | -0.07          | -0.057         |

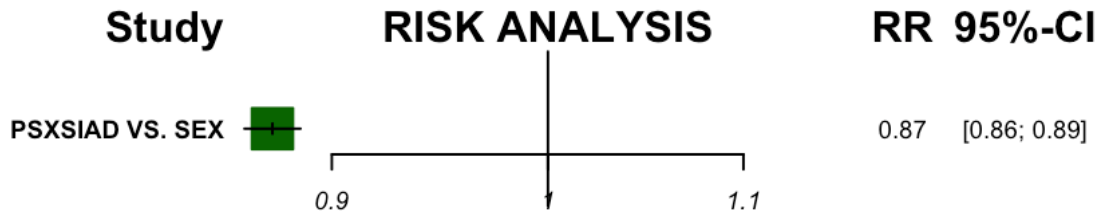

## EDxIHC vs. ASS\_FAM

ASS\_FAM = Presence of a non-family caregiver

### Confusion Matrix Computed

Confusion Matrix (Fisher's Exact Test for Count Data) - **p-value = 5.44e-06**

|              | EDxIHC + | EDxIHC - | Total | Inc risk * | Odds |
|--------------|----------|----------|-------|------------|------|
| ASS_FAM+     | 2720     | 1871     | 4591  | 59.2       | 1.45 |
| ASS_FAM-     | 34504    | 27338    | 61842 | 55.8       | 1.26 |
| <b>Total</b> | 37224    | 29209    | 66433 | 56.0       | 1.27 |

### Risk-Analysis Results

X2 test statistic - **p-value: 0**

| dati              | Estimate | 95%CI + | 95%CI - |
|-------------------|----------|---------|---------|
| <b>Risk Ratio</b> | 1.06     | 1.04    | 1.09    |
| <b>Odds Ratio</b> | 1.15     | 1.08    | 1.22    |

| dati                | Estimate | 95%CI + | 95%CI - |
|---------------------|----------|---------|---------|
| Attr.Risk           | 3.45     | 1.98    | 4.93    |
| Pop.Attr.Risk       | 0.239    | -0.305  | 0.782   |
| Attr.Fract.Risk     | 0.058    | 0.034   | 0.082   |
| Pop.Attr.Fract.Risk | 0.004    | 0.002   | 0.006   |

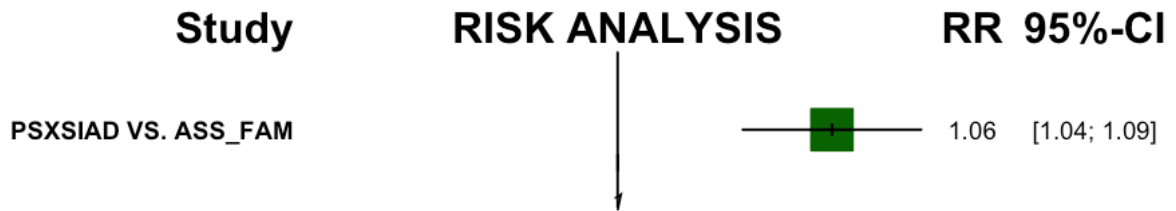

## Risk Analysis

### AGE vs. EDxIHC

Show/Hide Details

#### VAL-GROUP Confusion Matrix

Fisher's Exact Test for Count Data, **p: 9.76e-20**  
RR:0.784565916398714

|           | EDxIHC 1 | EDxIHC 0 | IR%   |
|-----------|----------|----------|-------|
| Age 19-65 | 6840     | 7187     | 0.488 |
| Ref. <=18 | 769      | 467      | 0.622 |

Fisher's Exact Test for Count Data, p: 4.75e-24  
RR:0.763665594855305

|           | EDxIHC 1 | EDxIHC 0 | IR%   |
|-----------|----------|----------|-------|
| Age 66-80 | 10805    | 11952    | 0.475 |
| Ref. <=18 | 769      | 467      | 0.622 |

Fisher's Exact Test for Count Data, p: 3.97e-50  
RR:0.65112540192926

|           | EDxIHC 1 | EDxIHC 0 | IR%   |
|-----------|----------|----------|-------|
| Age 81-90 | 8778     | 12878    | 0.405 |
| Ref. <=18 | 769      | 467      | 0.622 |

Fisher's Exact Test for Count Data, p: 3.70e-98  
RR:0.487138263665595

|            | EDxIHC 1 | EDxIHC 0 | IR%   |
|------------|----------|----------|-------|
| Age 91-100 | 1979     | 4552     | 0.303 |
| Ref. <=18  | 769      | 467      | 0.622 |

Fisher's Exact Test for Count Data, p: 7.83e-38  
RR:0.270096463022508

|           | EDxIHC 1 | EDxIHC 0 | IR%   |
|-----------|----------|----------|-------|
| Age >100  | 38       | 188      | 0.168 |
| Ref. <=18 | 769      | 467      | 0.622 |

MULTI\_GROUP Confusion Matrix

|              | EDxIHC + | EDxIHC - | Total | Inc risk* | Odds  |
|--------------|----------|----------|-------|-----------|-------|
| Age +        | 28440    | 36757    | 65197 | 43.6      | 0.774 |
| Age -        | 3845     | 2335     | 6180  | 62.2      | 1.647 |
| <b>Total</b> | 32285    | 39092    | 71377 | 45.2      | 0.826 |

### Risk-Analysis Results

X2 test statistic - p-value: 0

| dati                       | est    | lower  | upper  |
|----------------------------|--------|--------|--------|
| <b>Risk Ratio</b>          | 0.659  | 0.643  | 0.676  |
| <b>Odds Ratio</b>          | 0.422  | 0.398  | 0.448  |
| <b>Attr.Risk</b>           | -21.2  | -27    | -15.3  |
| <b>Pop.Attr.Risk</b>       | -17    | -18.2  | -15.7  |
| <b>Attr.Fract.Risk</b>     | -0.426 | -0.457 | -0.396 |
| <b>Pop.Attr.Fract.Risk</b> | -0.376 | -0.391 | -0.359 |

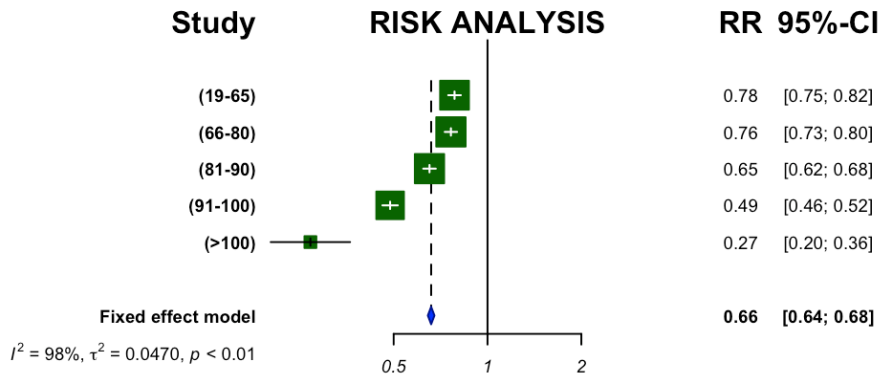

## FAMILY MEMBERS vs. EDxIHC

Show/Hide Details

### VAL-GROUP Confusion Matrix

Fisher's Exact Test for Count Data, **p: 7.58e-16**  
RR:1.0983606557377

|                              | EDxIHC<br>1 | EDxIHC<br>0 | IR%   |
|------------------------------|-------------|-------------|-------|
| Family<br>members<br>1_pers_ | 5182        | 5867        | 0.469 |

|  | EDxIHC<br>1 | EDxIHC<br>0 | IR% |
|--|-------------|-------------|-----|
|--|-------------|-------------|-----|

---

|                     |       |       |       |
|---------------------|-------|-------|-------|
| <b>Ref. 0 pers.</b> | 21361 | 28679 | 0.427 |
|---------------------|-------|-------|-------|

Fisher's Exact Test for Count Data, **p: 2.20e-10**  
RR:1.1288056206089

|  | EDxIHC<br>1 | EDxIHC<br>0 | IR% |
|--|-------------|-------------|-----|
|--|-------------|-------------|-----|

---

|                                   |      |      |       |
|-----------------------------------|------|------|-------|
| <b>Family members<br/>2_pers_</b> | 1695 | 1822 | 0.482 |
|-----------------------------------|------|------|-------|

---

|                     |       |       |       |
|---------------------|-------|-------|-------|
| <b>Ref. 0 pers.</b> | 21361 | 28679 | 0.427 |
|---------------------|-------|-------|-------|

Fisher's Exact Test for Count Data, **p: 1.97e-10**  
RR:1.21545667447307

|  | EDxIHC<br>1 | EDxIHC<br>0 | IR% |
|--|-------------|-------------|-----|
|--|-------------|-------------|-----|

---

|                                   |     |     |       |
|-----------------------------------|-----|-----|-------|
| <b>Family members<br/>3_pers_</b> | 634 | 588 | 0.519 |
|-----------------------------------|-----|-----|-------|

---

|                     |       |       |       |
|---------------------|-------|-------|-------|
| <b>Ref. 0 pers.</b> | 21361 | 28679 | 0.427 |
|---------------------|-------|-------|-------|

Fisher's Exact Test for Count Data, **p: 2.78e-05**  
RR:1.26463700234192

|  | EDxIHC<br>1 | EDxIHC<br>0 | IR% |
|--|-------------|-------------|-----|
|--|-------------|-------------|-----|

---

|                                   |     |     |      |
|-----------------------------------|-----|-----|------|
| <b>Family members<br/>4_pers_</b> | 189 | 161 | 0.54 |
|-----------------------------------|-----|-----|------|

|                     | EDxIHC<br>1 | EDxIHC<br>0 | IR%   |
|---------------------|-------------|-------------|-------|
| <b>Ref. 0 pers.</b> | 21361       | 28679       | 0.427 |

Fisher's Exact Test for Count Data, **p: 1.18e-06**  
RR:1.35831381733021

|                                  | EDxIHC<br>1 | EDxIHC<br>0 | IR%   |
|----------------------------------|-------------|-------------|-------|
| <b>Family members<br/>4+pers</b> | 148         | 107         | 0.58  |
| <b>Ref. 0 pers.</b>              | 21361       | 28679       | 0.427 |

#### MULTI\_GROUP Confusion Matrix

|                         | EDxIHC + | EDxIHC - | Total  | Inc risk * | Odds  |
|-------------------------|----------|----------|--------|------------|-------|
| <b>Family members +</b> | 7848     | 8545     | 16393  | 47.9       | 0.918 |
| <b>Family members -</b> | 106805   | 143395   | 250200 | 42.7       | 0.745 |
| <b>Total</b>            | 114653   | 151940   | 266593 | 43.0       | 0.755 |

#### Risk-Analysis Results

X2 test statistic - **p-value: 0**

| <b>dati</b>       | <b>est</b> | <b>lower</b> | <b>upper</b> |
|-------------------|------------|--------------|--------------|
| <b>Risk Ratio</b> | 1.12       | 1.1          | 1.14         |
| <b>Odds Ratio</b> | 1.24       | 1.2          | 1.28         |



| <b>dati</b>                | <b>est</b> | <b>lower</b> | <b>upper</b> |
|----------------------------|------------|--------------|--------------|
| <b>Attr.Risk</b>           | 5.31       | 1.71         | 8.9          |
| <b>Pop.Attr.Risk</b>       | 0.319      | 0.049        | 0.589        |
| <b>Attr.Fract.Risk</b>     | 0.108      | 0.093        | 0.123        |
| <b>Pop.Attr.Fract.Risk</b> | 0.007      | 0.007        | 0.008        |

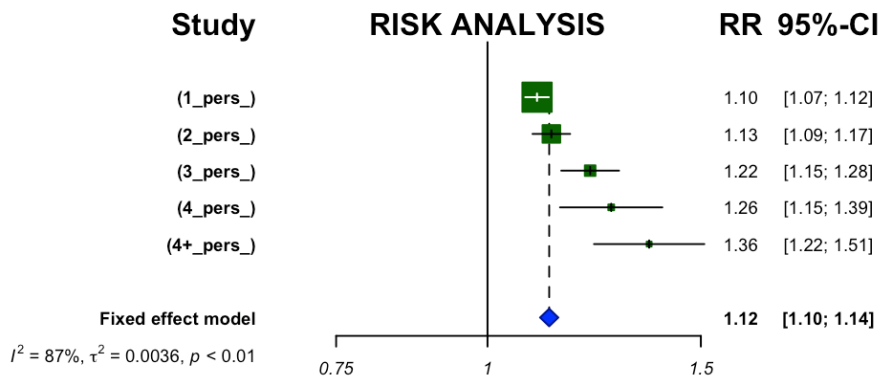

## PAT\_PREV vs. EDxIHC

PAT\_PREV = Prevalent disorder at IHC enrolment

Show/Hide Details

VAL-GROUP Confusion Matrix

Fisher's Exact Test for Count Data, **p: 4.90e-04**  
RR:0.954635108481262

|                                 | EDxIHC<br>1 | EDxIHC<br>0 | IR%   |
|---------------------------------|-------------|-------------|-------|
| <b>PAT_PREV</b><br><b>Altro</b> | 4190        | 4475        | 0.484 |
| <b>Ref. Neoplasm</b>            | 8595        | 8371        | 0.507 |

Fisher's Exact Test for Count Data, **p: 7.05e-18**  
RR:0.891518737672584

|                                       | EDxIHC<br>1 | EDxIHC<br>D 0 | IR%   |
|---------------------------------------|-------------|---------------|-------|
| <b>PAT_PREV</b><br><b>Circulatory</b> | 4483        | 5431          | 0.452 |
| <b>Ref. Neoplasm</b>                  | 8595        | 8371          | 0.507 |

Fisher's Exact Test for Count Data, **p: 2.07e-26**  
RR:0.812623274161736

|                                     | EDxIHC<br>1 | EDxIHC<br>0 | IR%   |
|-------------------------------------|-------------|-------------|-------|
| <b>PAT_PREV</b><br><b>Endocrine</b> | 1610        | 2294        | 0.412 |
| <b>Ref. Neoplasm</b>                | 8595        | 8371        | 0.507 |

Fisher's Exact Test for Count Data, **p: 1.66e-69**  
RR:0.654832347140039

|                            | EDxIHC<br>1 | EDxIHC<br>0 | IR%   |
|----------------------------|-------------|-------------|-------|
| <b>PAT_PREV<br/>Mental</b> | 965         | 1945        | 0.332 |
| <b>Ref. Neoplasm</b>       | 8595        | 8371        | 0.507 |

Fisher's Exact Test for Count Data, **p: 7.17e-10**  
RR:0.871794871794872

|                             | EDxIHC<br>1 | EDxIHC<br>0 | IR%   |
|-----------------------------|-------------|-------------|-------|
| <b>PAT_PREV<br/>Missing</b> | 1174        | 1481        | 0.442 |
| <b>Ref. Neoplasm</b>        | 8595        | 8371        | 0.507 |

Fisher's Exact Test for Count Data, **p: 7.70e-51**  
RR:0.678500986193294

|                                     | EDxIHC<br>1 | EDxIHC<br>0 | IR%   |
|-------------------------------------|-------------|-------------|-------|
| <b>PAT_PREV<br/>MuscoloSkeletal</b> | 819         | 1563        | 0.344 |
| <b>Ref. Neoplasm</b>                | 8595        | 8371        | 0.507 |

Fisher's Exact Test for Count Data, **p: 4.18e-21**  
RR:0.867850098619329

|                             | EDxIHC<br>1 | EDxIHC<br>0 | IR%  |
|-----------------------------|-------------|-------------|------|
| <b>PAT_PREV<br/>Nervous</b> | 3160        | 4017        | 0.44 |

|                      | EDxIHC<br>1 | EDxIHC<br>0 | IR%   |
|----------------------|-------------|-------------|-------|
| <b>Ref. Neoplasm</b> | 8595        | 8371        | 0.507 |

Fisher's Exact Test for Count Data, **p: 2.86e-47**  
RR:0.727810650887574

|                                 | EDxIHC<br>1 | EDxIHC<br>0 | IR%   |
|---------------------------------|-------------|-------------|-------|
| <b>PAT_PREV<br/>Respiratory</b> | 1191        | 2039        | 0.369 |
| <b>Ref. Neoplasm</b>            | 8595        | 8371        | 0.507 |

Fisher's Exact Test for Count Data, **p: 1.49e-28**  
RR:0.788954635108481

|                          | EDxIHC<br>1 | EDxIHC<br>0 | IR%   |
|--------------------------|-------------|-------------|-------|
| <b>PAT_PREV<br/>Skin</b> | 1270        | 1907        | 0.4   |
| <b>Ref. Neoplasm</b>     | 8595        | 8371        | 0.507 |

Fisher's Exact Test for Count Data, **p: 1.34e-128**  
RR:0.633136094674556

|                            | EDxIHC<br>1 | EDxIHC<br>0 | IR%   |
|----------------------------|-------------|-------------|-------|
| <b>PAT_PREV<br/>Trauma</b> | 1752        | 3701        | 0.321 |
| <b>Ref. Neoplasm</b>       | 8595        | 8371        | 0.507 |

MULTI\_GROUP Confusion Matrix

|              | EDxIHC + | EDxIHC - | Total  | Inc risk* | Odds  |
|--------------|----------|----------|--------|-----------|-------|
| PAT_PREV+    | 20614    | 28853    | 49467  | 41.7      | 0.714 |
| PAT_PREV-    | 85950    | 83710    | 169660 | 50.7      | 1.027 |
| <b>Total</b> | 106564   | 112563   | 219127 | 48.6      | 0.947 |

### Risk-Analysis Results

X2 test statistic - p-value: 0

| dati                       | est    | lower  | upper  |
|----------------------------|--------|--------|--------|
| <b>Risk Ratio</b>          | 0.814  | 0.804  | 0.823  |
| <b>Odds Ratio</b>          | 0.683  | 0.669  | 0.697  |
| <b>Attr.Risk</b>           | -9.44  | -10.2  | -8.65  |
| <b>Pop.Attr.Risk</b>       | -2.03  | -2.35  | -1.71  |
| <b>Attr.Fract.Risk</b>     | -0.216 | -0.23  | -0.202 |
| <b>Pop.Attr.Fract.Risk</b> | -0.042 | -0.042 | -0.041 |

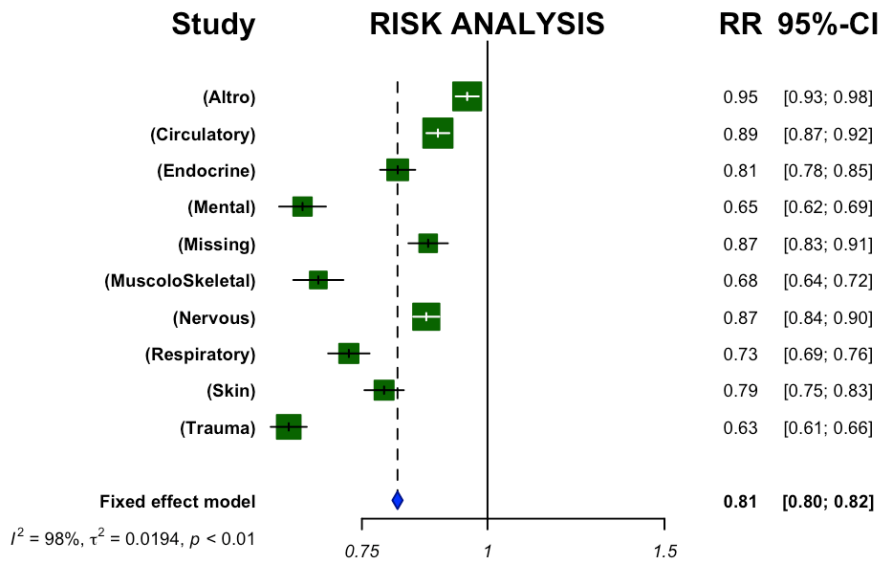

## DURATION OF IHC EVENT vs. EDxIHC

GA= Days

Show/Hide Details

VAL-GROUP Confusion Matrix

Fisher's Exact Test for Count Data, **p: 0.00e+00**  
RR:1.72435897435897

**EDxIHC 1 EDxIHC 0 IR%**

|                   |      |      |       |
|-------------------|------|------|-------|
| <b>GA_101-200</b> | 6078 | 5228 | 0.538 |
|-------------------|------|------|-------|

|                        |       |       |       |
|------------------------|-------|-------|-------|
| <b>Ref. GA.&lt;100</b> | 11929 | 26286 | 0.312 |
|------------------------|-------|-------|-------|

Fisher's Exact Test for Count Data, **p: 0.00e+00**  
RR:2.06410256410256

**EDxIHC 1 EDxIHC 0 IR%**

|                   |      |      |       |
|-------------------|------|------|-------|
| <b>GA_201-300</b> | 3538 | 1960 | 0.644 |
|-------------------|------|------|-------|

|                        |       |       |       |
|------------------------|-------|-------|-------|
| <b>Ref. GA.&lt;100</b> | 11929 | 26286 | 0.312 |
|------------------------|-------|-------|-------|

Fisher's Exact Test for Count Data, **p: 0.00e+00**  
RR:2.0224358974359

**EDxIHC 1 EDxIHC 0 IR%**

|                   |      |      |       |
|-------------------|------|------|-------|
| <b>GA_301-400</b> | 5256 | 3072 | 0.631 |
|-------------------|------|------|-------|

|                        |       |       |       |
|------------------------|-------|-------|-------|
| <b>Ref. GA.&lt;100</b> | 11929 | 26286 | 0.312 |
|------------------------|-------|-------|-------|

Fisher's Exact Test for Count Data, **p: 0.00e+00**  
RR:2.5

**EDxIHC 1 EDxIHC 0 IR%**

|                   |      |     |      |
|-------------------|------|-----|------|
| <b>GA_&gt;400</b> | 2408 | 678 | 0.78 |
|-------------------|------|-----|------|

|                        |       |       |       |
|------------------------|-------|-------|-------|
| <b>Ref. GA.&lt;100</b> | 11929 | 26286 | 0.312 |
|------------------------|-------|-------|-------|

**MULTI\_GROUP Confusion Matrix**

|            | <b>EDxIHC +</b> | <b>EDxIHC -</b> | <b>Total</b> | <b>Inc risk *</b> | <b>Odds</b> |
|------------|-----------------|-----------------|--------------|-------------------|-------------|
| <b>GA+</b> | 17280           | 10938           | 28218        | 61.2              | 1.580       |

|              | <b>EDxIHC +</b> | <b>EDxIHC -</b> | <b>Total</b> | <b>Inc risk *</b> | <b>Odds</b> |
|--------------|-----------------|-----------------|--------------|-------------------|-------------|
| <b>GA-</b>   | 47716           | 105144          | 152860       | 31.2              | 0.454       |
| <b>Total</b> | 64996           | 116082          | 181078       | 35.9              | 0.560       |

### Risk-Analysis Results

X2 test statistic - **p-value: 0**

| <b>dati</b>                | <b>est</b> | <b>lower</b> | <b>upper</b> |
|----------------------------|------------|--------------|--------------|
| <b>Risk Ratio</b>          | 1.98       | 1.95         | 2            |
| <b>Odds Ratio</b>          | 3.55       | 3.45         | 3.64         |
| <b>Attr.Risk</b>           | 30.5       | 28.6         | 32.4         |
| <b>Pop.Attr.Risk</b>       | 4.68       | 4.36         | 5            |
| <b>Attr.Fract.Risk</b>     | 0.49       | 0.484        | 0.496        |
| <b>Pop.Attr.Fract.Risk</b> | 0.13       | 0.129        | 0.131        |



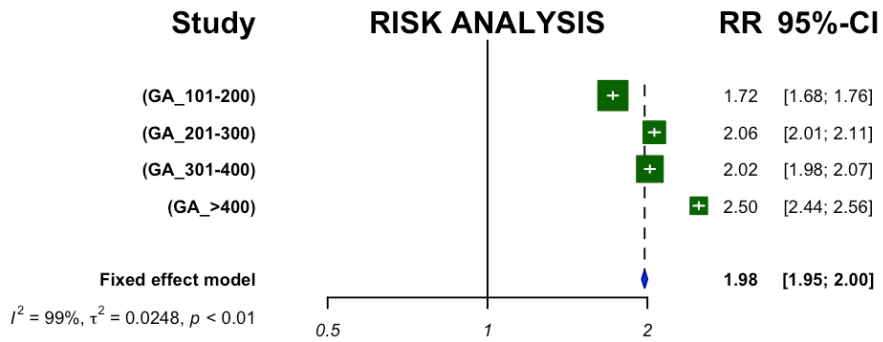

## PROPONENT of referral to IHC vs. EDxIHC

**PROP\_PA\_02+06+08+09=Residential facilities/other settings**

**PROP\_PA.01= General practitioner**

**PROP\_PA\_03-04-05-07= Hospital**

Show/Hide Details

VAL-GROUP Confusion Matrix

Fisher's Exact Test for Count Data, **p: 5.97e-06**  
RR:1.05827505827506

|                                 | EDxIHC<br>1 | EDxIHC<br>0 | IR%   |
|---------------------------------|-------------|-------------|-------|
| <b>PROP_<br/>PA_02+06+08+09</b> | 4686        | 5637        | 0.454 |
| <b>Ref. PA.01</b>               | 19749       | 26241       | 0.429 |

Fisher's Exact Test for Count Data, **p: 9.18e-15**  
RR:1.1002331002331

|                                     | EDxIHC<br>1 | EDxIHC<br>0 | IR%   |
|-------------------------------------|-------------|-------------|-------|
| <b>PROP<br/>PA_03-04-05-<br/>07</b> | 4774        | 5346        | 0.472 |
| <b>Ref. PA.01</b>                   | 19749       | 26241       | 0.429 |

#### MULTI\_GROUP Confusion Matrix

|              | EDxIHC + | EDxIHC - | Total  | Inc risk * | Odds  |
|--------------|----------|----------|--------|------------|-------|
| <b>PROP+</b> | 9460     | 10983    | 20443  | 46.3       | 0.861 |
| <b>PROP-</b> | 39498    | 52482    | 91980  | 42.9       | 0.753 |
| <b>Total</b> | 48958    | 63465    | 112423 | 43.5       | 0.771 |

#### Risk-Analysis Results

X2 test statistic - **p-value: 0**

| <b>dati</b>                | <b>est</b> | <b>lower</b> | <b>upper</b> |
|----------------------------|------------|--------------|--------------|
| <b>Risk Ratio</b>          | 1.08       | 1.06         | 1.1          |
| <b>Odds Ratio</b>          | 1.15       | 1.11         | 1.18         |
| <b>Attr.Risk</b>           | 3.33       | 1.83         | 4.84         |
| <b>Pop.Attr.Risk</b>       | 0.606      | 0.174        | 1.04         |
| <b>Attr.Fract.Risk</b>     | 0.072      | 0.056        | 0.087        |
| <b>Pop.Attr.Fract.Risk</b> | 0.014      | 0.013        | 0.015        |

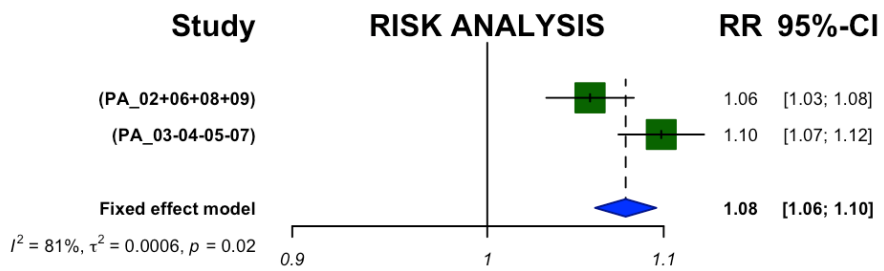

Supplement: ijhpm-10-605-s001.pdf [file ijhpm-10-605-s001.pdf]
